# Supplementary material for: A comparison of four clustering methods for brain expression microarray data
Source: Springer Nature journal article supplement (doi:10.1186/1471-2105-9-490), 2008-11-25
Supplement: 12859_2008_2475_MOESM8_ESM.pdf [file 12859_2008_2475_MOESM8_ESM.pdf]

All genes are distributed among an arbitrary number of arbitrary clusters

The next gene in order is picked

The effect on the cluster indicator variables of moving this gene to a cluster on its own is calculated

The next cluster in order is picked

The effect on the cluster indicator variables of moving this gene to this cluster is calculated

Have the effects of moving this gene to all clusters been calculated?

No

Yes

One of the possible 'moves' for the gene is chosen at random, with probabilities proportional to their effect on the cluster indicator variables

Has a move been calculated for all genes?

No

Yes

Has the number of clusters converged, or the limit on the number of iterations been reached?

Yes

No

Finish

The genes are passed through again, from the beginning
