# Supplementary material for: A comparison of four clustering methods for brain expression microarray data
Source: Springer Nature journal article supplement (doi:10.1186/1471-2105-9-490), 2008-11-25
Supplement: 12859_2008_2475_MOESM9_ESM.pdf [file 12859_2008_2475_MOESM9_ESM.pdf]

Random sample of genes picked

Mean expression of each sample over these genes in the sample normalised matrix found – weighted by the score of each gene (initially equal)

Those samples with mean expression  $T_c$  standard deviations above this value are selected and these mean values taken as 'sample scores' –  $T_c$  is a predefined threshold value

Mean expression of each gene over these samples in the gene normalised matrix found – weighted by the score of each sample

Those genes with mean expression  $T_g$  standard deviations above this value are selected and these mean values taken as 'gene scores' –  $T_g$  is a predefined threshold value

Are selected genes the same as the previous iteration?

No

Yes

Selected genes and samples are written to a file (with scores)

Have sufficient random samples been processed?

No

Yes

Finish
